# Supplementary material for: Association Between Homeschooling and Adolescent Sleep Duration and Health During COVID-19 Pandemic High School Closures
Source: PubMed Central journal article supplement (PMC8733832; doi:10.1001/jamanetworkopen.2021.42100), 2022-01-05
Supplement: jamanetwopen-e2142100-s001.pdf [file jamanetwopen-e2142100-s001.pdf]

## Supplementary Online Content

Albrecht JN, Werner H, Rieger N, et al. Association between homeschooling and adolescent sleep duration and health during COVID-19 pandemic high school closures. *JAMA Netw Open*. 2022;5(1):e2142100. doi:10.1001/jamanetworkopen.2021.42100

**eTable 1.** All Questions and Answer Formats or Response Scales

**eTable 2.** Predictors Included in the Mixed Models

This supplementary material has been provided by the authors to give readers additional information about their work.

## Supplementary Material

### Questionnaire

All questions listed below in eTable 1 were originally in German. If not specified differently, the questions were the same for the control and the lockdown samples.

**eTable 1. All questions and answer formats or response scales.**

|                               | <i>Variable</i>               | <i>Question</i>                                                                                                                                                            | <i>Answer format or response scale</i> |
|-------------------------------|-------------------------------|----------------------------------------------------------------------------------------------------------------------------------------------------------------------------|----------------------------------------|
| <b>Sample characteristics</b> | Biological sex                | Your sex?                                                                                                                                                                  | Male / female                          |
|                               | Age                           | Your age?                                                                                                                                                                  | In years                               |
|                               | Primary language              | What is your primary language?                                                                                                                                             | Swiss German / German / else           |
|                               | Physical disease              | Do you suffer from a physical disease?                                                                                                                                     | Yes / no                               |
|                               | Mental disease                | Are you currently in therapy because of a psychiatric disorder?                                                                                                            | Yes / no                               |
|                               | School                        | To which school do you go?                                                                                                                                                 | Selection of one of the 21 schools     |
| <b>Sleep characteristics</b>  | Bedtime on SC days            | Control sample: When do you normally go to bed on scheduled days (school days)?<br>Lockdown sample: When do you normally go to bed on scheduled days (homeschooling days)? | Hours:minutes                          |
|                               | Wake time on SC days          | Control sample: When do you normally wake up on scheduled days (school days)?<br>Lockdown sample: When do you normally wake up on scheduled days (homeschooling days)?     | Hours:minutes                          |
|                               | Bedtime on SC days            | When do you normally go to bed on free days (weekends, holidays)?                                                                                                          | Hours:minutes                          |
|                               | Wake time on SC days          | When do you normally wake up on free days (weekends, holidays)?                                                                                                            | Hours:minutes                          |
|                               | Alarm clock usage             | I use an alarm clock on scheduled days                                                                                                                                     | Yes / no                               |
|                               | Difficulties falling asleep   | How often did you have difficulties falling asleep in the past 14 days?                                                                                                    | Never – 14x                            |
|                               | Difficulties sleeping through | How often did you have difficulties sleeping through the night in the past 14 days?                                                                                        | Never – 14x                            |

|                                                       | <i>Variable</i>                                                                                                                                                                                                                              | <i>Question</i>                                                                        | <i>Answer format or response scale</i>                                                      |
|-------------------------------------------------------|----------------------------------------------------------------------------------------------------------------------------------------------------------------------------------------------------------------------------------------------|----------------------------------------------------------------------------------------|---------------------------------------------------------------------------------------------|
| <b>Health-related and behavioural characteristics</b> | Health-related quality of life                                                                                                                                                                                                               | KIDSCREEN-10 <sup>1</sup>                                                              |                                                                                             |
|                                                       | Depressive symptoms                                                                                                                                                                                                                          | Only in lockdown sample: Youth Self Report withdrawn/depression scale <sup>2</sup>     |                                                                                             |
|                                                       | Caffeine consumption                                                                                                                                                                                                                         | On how many days (incl. the weekend) do you consume the following drinks? <sup>3</sup> |                                                                                             |
|                                                       |                                                                                                                                                                                                                                              | Coffee (e.g. cappuccino, espresso)                                                     | Every day (1) / almost every day / several times per week / once a week / rarer / never (5) |
|                                                       |                                                                                                                                                                                                                                              | Energy drinks (e.g. Red Bull)                                                          | Every day (1) / almost every day / several times per week / once a week / rarer / never (5) |
|                                                       |                                                                                                                                                                                                                                              | Coca-Cola-like sweet drinks (e.g. Coca-Cola, Pepsi, Afri-Cola)                         | Every day (1) / almost every day / several times per week / once a week / rarer / never (5) |
|                                                       |                                                                                                                                                                                                                                              | Black, white, or green tea                                                             | Every day (1) / almost every day / several times per week / once a week / rarer / never (5) |
|                                                       | Alcohol consumption                                                                                                                                                                                                                          | On how many days (incl. the weekend) do you consume the following drinks? <sup>4</sup> |                                                                                             |
|                                                       |                                                                                                                                                                                                                                              | Beer                                                                                   | Every day (1) / almost every day / several times per week / once a week / rarer / never (5) |
|                                                       |                                                                                                                                                                                                                                              | Wine                                                                                   | Every day (1) / almost every day / several times per week / once a week / rarer / never (5) |
|                                                       |                                                                                                                                                                                                                                              | Spirits (such as gin, whiskey, ...)                                                    | Every day (1) / almost every day / several times per week / once a week / rarer / never (5) |
|                                                       | Smoking                                                                                                                                                                                                                                      | Do you smoke?                                                                          | Yes / no                                                                                    |
|                                                       | Number of cigarettes <sup>5</sup>                                                                                                                                                                                                            | How many cigarettes do you smoke on a typical weekday?                                 | Number of cigarettes                                                                        |
|                                                       |                                                                                                                                                                                                                                              | How many cigarettes do you smoke on a typical weekend?                                 | Number of cigarettes                                                                        |
| Digital media use                                     | Control sample: How much time do you usually spend on scheduled days with digital media (smartphone, iPad, tablet, PC, etc.)?<br>Lockdown sample: How much time do you usually spend on scheduled days with digital media (smartphone, iPad, | Hours:minutes                                                                          |                                                                                             |

|                                                                                                                                                                                                                                                                                                                                                                                                                                                                                                                                                                                                                                                                                                                                                                                                                                                                                                                                                                                                                                                                                                                                                            | <i>Variable</i>                         | <i>Question</i>                                                                                                                                                    | <i>Answer format or response scale</i> |
|------------------------------------------------------------------------------------------------------------------------------------------------------------------------------------------------------------------------------------------------------------------------------------------------------------------------------------------------------------------------------------------------------------------------------------------------------------------------------------------------------------------------------------------------------------------------------------------------------------------------------------------------------------------------------------------------------------------------------------------------------------------------------------------------------------------------------------------------------------------------------------------------------------------------------------------------------------------------------------------------------------------------------------------------------------------------------------------------------------------------------------------------------------|-----------------------------------------|--------------------------------------------------------------------------------------------------------------------------------------------------------------------|----------------------------------------|
|                                                                                                                                                                                                                                                                                                                                                                                                                                                                                                                                                                                                                                                                                                                                                                                                                                                                                                                                                                                                                                                                                                                                                            |                                         | tablet, PC, etc.)? Please only refer to the time spent with digital media in your free time.                                                                       |                                        |
| <b>COVID-19-related measures (lockdown sample only)</b>                                                                                                                                                                                                                                                                                                                                                                                                                                                                                                                                                                                                                                                                                                                                                                                                                                                                                                                                                                                                                                                                                                    | Homeschooling                           | Do the lessons of your class currently take place in homeschooling?                                                                                                | Yes / no                               |
|                                                                                                                                                                                                                                                                                                                                                                                                                                                                                                                                                                                                                                                                                                                                                                                                                                                                                                                                                                                                                                                                                                                                                            | Changes in social contacts              | How much did my social contacts with friends or other people change (e.g. frequency, manner, duration)?                                                            | 1: not at all – 5: very strongly       |
|                                                                                                                                                                                                                                                                                                                                                                                                                                                                                                                                                                                                                                                                                                                                                                                                                                                                                                                                                                                                                                                                                                                                                            | Changes in use of digital media         | How much did my digital media use in my free time change (e.g. Netflix, Youtube, gaming with smartphone, iPad, tablet, PC) compared to before the corona pandemic? | 1: not at all – 5: very strongly       |
|                                                                                                                                                                                                                                                                                                                                                                                                                                                                                                                                                                                                                                                                                                                                                                                                                                                                                                                                                                                                                                                                                                                                                            | Changes in sports                       | How much did my sports activities change compared to before the corona pandemic?                                                                                   | 1: not at all – 5: very strongly       |
|                                                                                                                                                                                                                                                                                                                                                                                                                                                                                                                                                                                                                                                                                                                                                                                                                                                                                                                                                                                                                                                                                                                                                            | Worry about future academic achievement | I worry that the pandemic will negatively impact my future academic achievement.                                                                                   | 1: not at all – 5: very strongly       |
|                                                                                                                                                                                                                                                                                                                                                                                                                                                                                                                                                                                                                                                                                                                                                                                                                                                                                                                                                                                                                                                                                                                                                            | COVID-19 exposure - self                | I suffer from corona?                                                                                                                                              | No / Yes, currently / Yes, recovered   |
|                                                                                                                                                                                                                                                                                                                                                                                                                                                                                                                                                                                                                                                                                                                                                                                                                                                                                                                                                                                                                                                                                                                                                            | COVID-19 exposure - household           | Does someone in your household suffer from corona?                                                                                                                 | No / Yes, currently / Yes, recovered   |
|                                                                                                                                                                                                                                                                                                                                                                                                                                                                                                                                                                                                                                                                                                                                                                                                                                                                                                                                                                                                                                                                                                                                                            | COVID-19 exposure - someone close       | Does someone you're close with (e.g. grandparent, friend) suffer from corona?                                                                                      | No / Yes, currently / Yes, recovered   |
| <p><i>Notes:</i></p> <p><sup>1</sup> Ravens-Sieberer U, Erhart M, Rajmil L, et al. Reliability, construct and criterion validity of the KIDSCREEN-10 score: A short measure for children and adolescents' well-being and health-related quality of life. <i>Qual Life Res.</i> 2010;19(10):1487-1500. doi:10.1007/s11136-010-9706-5</p> <p><sup>2</sup> Döpfner M, Plück J, Kinnen C. <i>Für Die Arbeitsgruppe Deutsche Child Behavior Checklist. Manual Deutsche Schulalter-Formen Der Child Behavior Checklist von Thomas M. Achenbach. Elternfragebogen Über Das Verhalten von Kindern Und Jugendlichen.</i> Göttingen: Hogrefe; 2014.</p> <p><sup>3</sup> The answer scores for all four beverages were summed up, leading to a total score of 0–20 on which higher scores indicate greater weekly caffeine consumption.</p> <p><sup>4</sup> The answer scores for all three beverages were summed up, leading to a total score of 0–15 on which higher scores indicate greater weekly alcohol consumption.</p> <p><sup>5</sup> The answers of the two questions were afterwards combined into one single measure of weekly cigarette consumption.</p> |                                         |                                                                                                                                                                    |                                        |

**eTable 2. Predictors included in the mixed models.**

|                                                                              | <i>Dependent variable</i>                               | <i>Fixed effects</i>                            | <i>Random effect</i> | <i>Random slopes</i>                       |
|------------------------------------------------------------------------------|---------------------------------------------------------|-------------------------------------------------|----------------------|--------------------------------------------|
| <b>Sample differences in sleep</b>                                           | Bedtime on SC days                                      | Sample, age, primary language, physical disease | School               | Sample, primary language                   |
|                                                                              | Bedtime on FR days                                      | Sample, age, primary language, physical disease | School               | Sample, primary language, physical disease |
|                                                                              | Wake time on SC days                                    | Sample, age, primary language, physical disease | School               | Sample, age, primary language              |
|                                                                              | Wake time on FR days                                    | Sample, age, primary language, physical disease | School               | Sample                                     |
|                                                                              | Sleep period on SC days                                 | Sample, age, primary language, physical disease | School               | Sample, age                                |
|                                                                              | Sleep period on FR days                                 | Sample, age, primary language, physical disease | School               | Sample                                     |
|                                                                              | Sleep deficit                                           | Sample, age, primary language, physical disease | School               | Sample, physical disease                   |
|                                                                              | Difficulties falling asleep (square-root transformed)   | Sample, age, primary language, physical disease | School               | Age                                        |
|                                                                              | Difficulties sleeping through (square-root transformed) | Sample, age, primary language, physical disease | School               | Age                                        |
|                                                                              | Alarm clock usage on SC days                            | Sample, age, primary language, physical disease | School               | Sample                                     |
| <b>Sample differences in healthy-related and behavioural characteristics</b> | Health-related quality of life                          | Sample, age, primary language, physical disease | School               | -                                          |
|                                                                              | Alcohol consumption                                     | Sample, age, primary language, physical disease | School               | Age                                        |
|                                                                              | Smoking (# cigarettes per day)                          | Sample, age, primary language, physical disease | School               | -                                          |
|                                                                              | Caffeine consumption                                    | Sample, age, primary language, physical disease | School               | Primary language                           |
|                                                                              | Digital media use (square-root transformed)             | Sample, age, primary language, physical disease | School               | -                                          |

|                                                                                                          | <i>Dependent variable</i>      | <i>Fixed effects</i>                                                            | <i>Random effect</i> | <i>Random slopes</i>     |
|----------------------------------------------------------------------------------------------------------|--------------------------------|---------------------------------------------------------------------------------|----------------------|--------------------------|
| <b>Associations of sleep period and health-related characteristics</b>                                   | Health-related quality of life | Sample, sleep period, age, primary language, physical disease                   | School               | Sleep period             |
|                                                                                                          | Alcohol consumption            | Sample, sleep period, age, primary language, physical disease                   | School               | Age                      |
|                                                                                                          | Caffeine consumption           | Sample, sleep period, age, primary language, physical disease                   | School               | Sample, sleep period     |
| <b>Only lockdown sample: Associations of sleep period and health-related characteristics</b>             | Health-related quality of life | Sleep period, age, primary language, physical disease                           | School               | -                        |
|                                                                                                          | Alcohol consumption            | Sleep period, age, primary language, physical disease                           | School               | Age                      |
|                                                                                                          | Caffeine consumption           | Sleep period, age, primary language, physical disease                           | School               | -                        |
| <b>Only lockdown sample: Associations of YSR withdrawn/depression and health-related characteristics</b> | Health-related quality of life | Sleep period, YSR withdrawn/depression, age, primary language, physical disease | School               | YSR withdrawn/depression |
|                                                                                                          | Alcohol consumption            | Sleep period, YSR withdrawn/depression, age, primary language, physical disease | School               | Age                      |
|                                                                                                          | Caffeine consumption           | Sleep period, YSR withdrawn/depression, age, primary language, physical disease | School               | -                        |
